# Supplementary material for: Potentially inappropriate medication and its associated factors in older people living in nursing homes: a cross-sectional study
Source: PeerJ. 2025 Jul 8;13:e19570. doi: 10.7717/peerj.19570 (PMC12248223; doi:10.7717/peerj.19570)
Supplement: Supplemental Information 1 [file peerj-13-19570-s001.doc]

STROBE Statement—Checklist of items that should be included in reports of ***cross-sectional studies***

|  | Item No | Recommendation | Nº page |
| --- | --- | --- | --- |
| **Title and abstract** | 1 | (*a*) Indicate the study’s design with a commonly used term in the title or the abstract | Title page |
| (*b*) Provide in the abstract an informative and balanced summary of what was done and what was found | Abstract page |
| Introduction | | |  |
| Background/rationale | 2 | Explain the scientific background and rationale for the investigation being reported | Manuscript page 1 |
| Objectives | 3 | State specific objectives, including any prespecified hypotheses | Manuscript page 2 |
| Methods | | |  |
| Study design | 4 | Present key elements of study design early in the paper | Manuscript page 2 |
| Setting | 5 | Describe the setting, locations, and relevant dates, including periods of recruitment, exposure, follow-up, and data collection | Manuscript page 2 |
| Participants | 6 | (*a*) Give the eligibility criteria, and the sources and methods of selection of participants | Manuscript page 2 |
| Variables | 7 | Clearly define all outcomes, exposures, predictors, potential confounders, and effect modifiers. Give diagnostic criteria, if applicable | Manuscript page 2-3 |
| Data sources/ measurement | 8* | For each variable of interest, give sources of data and details of methods of assessment (measurement). Describe comparability of assessment methods if there is more than one group | Manuscript page 2-3 |
| Bias | 9 | Describe any efforts to address potential sources of bias | Manuscript page 3-4? |
| Study size | 10 | Explain how the study size was arrived at | Manuscript page 2 |
| Quantitative variables | 11 | Explain how quantitative variables were handled in the analyses. If applicable, describe which groupings were chosen and why | Manuscript page 3-4 |
| Statistical methods | 12 | (*a*) Describe all statistical methods, including those used to control for confounding | Manuscript page 3-4 |
| (*b*) Describe any methods used to examine subgroups and interactions | Manuscript page 3-4 |
| (*c*) Explain how missing data were addressed | Manuscript page 3-4 |
| (*d*) If applicable, describe analytical methods taking account of sampling strategy | Manuscript page 3-4 |
| (*e*) Describe any sensitivity analyses | Manuscript page 3-4 |
| Results | | |  |
| Participants | 13* | (a) Report numbers of individuals at each stage of study—eg numbers potentially eligible, examined for eligibility, confirmed eligible, included in the study, completing follow-up, and analysed | Manuscript page 4 |
| (b) Give reasons for non-participation at each stage | Manuscript page 4 |
| (c) Consider use of a flow diagram | Manuscript page 4. Fig 1 |
| Descriptive data | 14* | (a) Give characteristics of study participants (eg demographic, clinical, social) and information on exposures and potential confounders | Manuscript page 4 Table 1 and 2 |
| (b) Indicate number of participants with missing data for each variable of interest | Manuscript page 4 Table 1 and 2 |
| Outcome data | 15* | Report numbers of outcome events or summary measures | Manuscript page 5 |
| Main results | 16 | (*a*) Give unadjusted estimates and, if applicable, confounder-adjusted estimates and their precision (eg, 95% confidence interval). Make clear which confounders were adjusted for and why they were included | Manuscript page 5, Table 3 |
| (*b*) Report category boundaries when continuous variables were categorized | Manuscript page 5, Table 3 |
| (*c*) If relevant, consider translating estimates of relative risk into absolute risk for a meaningful time period | -- |
| Other analyses | 17 | Report other analyses done—eg analyses of subgroups and interactions, and sensitivity analyses | .. |
| Discussion | | |  |
| Key results | 18 | Summarise key results with reference to study objectives | Manuscript page 5 |
| Limitations | 19 | Discuss limitations of the study, taking into account sources of potential bias or imprecision. Discuss both direction and magnitude of any potential bias | Manuscript page 7 |
| Interpretation | 20 | Give a cautious overall interpretation of results considering objectives, limitations, multiplicity of analyses, results from similar studies, and other relevant evidence | Manuscript page 7 |
| Generalisability | 21 | Discuss the generalisability (external validity) of the study results | Manuscript page 7 |
| Other information | | |  |
| Funding | 22 | Give the source of funding and the role of the funders for the present study and, if applicable, for the original study on which the present article is based | Manuscript page 8 |

*Give information separately for exposed and unexposed groups.

**Note:** An Explanation and Elaboration article discusses each checklist item and gives methodological background and published examples of transparent reporting. The STROBE checklist is best used in conjunction with this article (freely available on the Web sites of PLoS Medicine at http://www.plosmedicine.org/, Annals of Internal Medicine at http://www.annals.org/, and Epidemiology at http://www.epidem.com/). Information on the STROBE Initiative is available at www.strobe-statement.org.
